# Supplementary material
Source: PubMed Central journal article supplement (PMC3471696)
Supplement: supp_M112.403287_jbc.M112.403287-1.pdf [file supp_M112.403287_jbc.M112.403287-1.pdf]

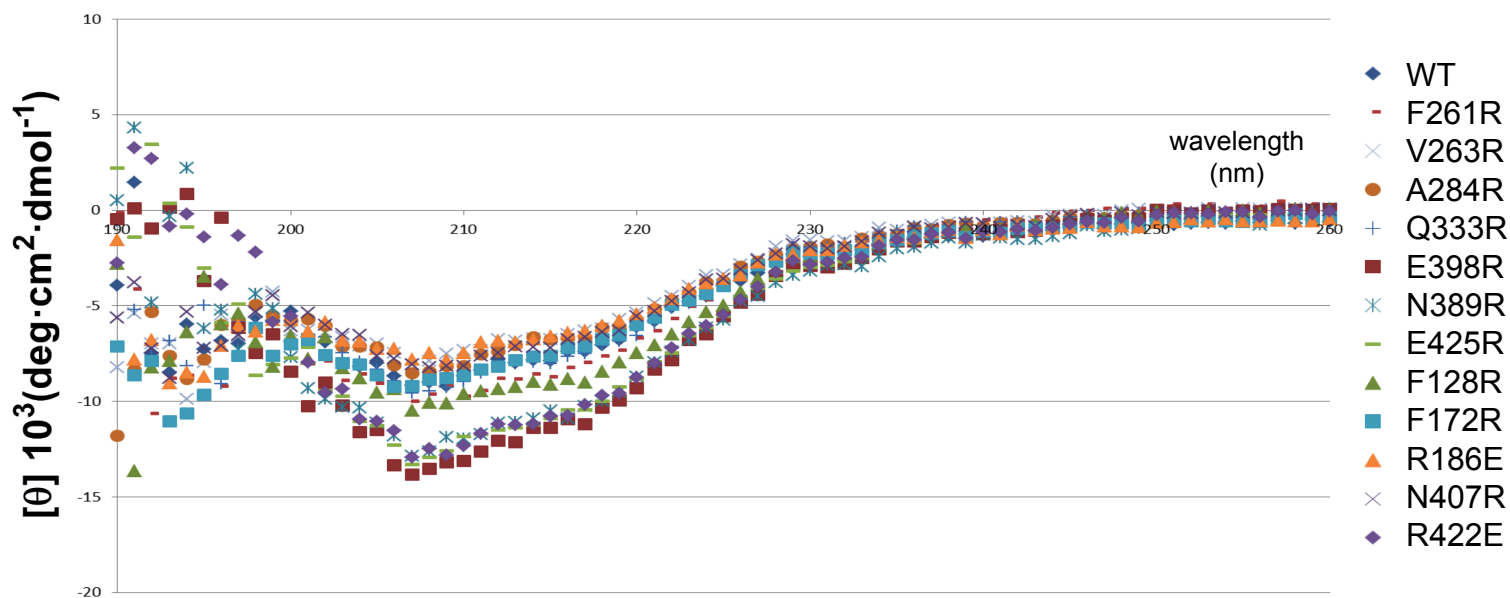

|          |       | Helix1 | Helix2 | Strand1 | Strand2 | Turns | Unordered | Total | NRMSD | (mg/ml) |
|----------|-------|--------|--------|---------|---------|-------|-----------|-------|-------|---------|
| WT       |       | 0.00   | 0.07   | 0.21    | 0.12    | 0.25  | 0.35      | 1.00  | 0.11  | 1.4     |
| NTD MUTS | F128R | 0.00   | 0.06   | 0.25    | 0.13    | 0.24  | 0.31      | 0.99  | 0.11  | 1.5     |
|          | F172R | 0.00   | 0.07   | 0.24    | 0.14    | 0.24  | 0.31      | 1.00  | 0.06  | 1.3     |
|          | R186E | 0.00   | 0.06   | 0.25    | 0.13    | 0.23  | 0.32      | 0.99  | 0.09  | 1.2     |
| BTD MUTS | F261R | 0.00   | 0.05   | 0.26    | 0.13    | 0.22  | 0.33      | 0.99  | 0.10  | 1.5     |
|          | V263R | 0.00   | 0.06   | 0.26    | 0.13    | 0.23  | 0.31      | 0.99  | 0.08  | 1.2     |
|          | A284R | 0.00   | 0.07   | 0.24    | 0.14    | 0.24  | 0.30      | 0.99  | 0.08  | 1.3     |
|          | Q333R | 0.00   | 0.06   | 0.26    | 0.13    | 0.22  | 0.32      | 0.99  | 0.09  | 1.4     |
| CTD MUTS | E398R | 0.00   | 0.05   | 0.24    | 0.12    | 0.23  | 0.35      | 0.99  | 0.06  | 1.9     |
|          | N389R | 0.00   | 0.08   | 0.20    | 0.13    | 0.22  | 0.36      | 0.99  | 0.10  | 1.8     |
|          | E425R | 0.00   | 0.06   | 0.26    | 0.12    | 0.21  | 0.33      | 0.98  | 0.07  | 1.7     |
|          | N407R | 0.00   | 0.06   | 0.25    | 0.13    | 0.23  | 0.32      | 0.99  | 0.08  | 1.2     |
|          | R422E | 0.01   | 0.06   | 0.23    | 0.13    | 0.22  | 0.32      | 0.97  | 0.07  | 1.7     |

**Figure S1. CD analysis of CSL mutants.** Wild-type and mutant CSL proteins were purified to homogeneity from bacteria, and analyzed by CD in a buffer containing 50mM sodium phosphate pH 6.5 and 75mM NaCl. *Top*, far UV circular dichroism data for wild-type CSL and 12 mutants, showing overall similar spectra. *Bottom*, CD data were analyzed on Dichroweb with CDSSTR using reference set 4, showing overall similar secondary structure content for wild-type and mutant CSL proteins. NRMSD values and protein concentrations (mg/ml) are also shown.

**A**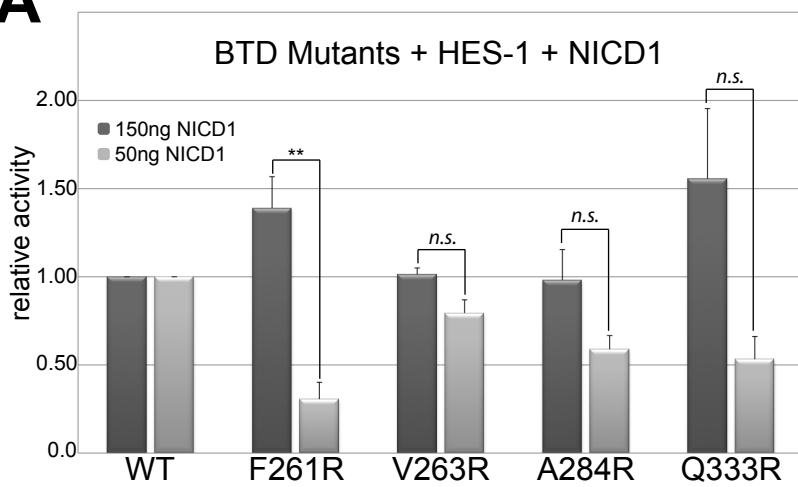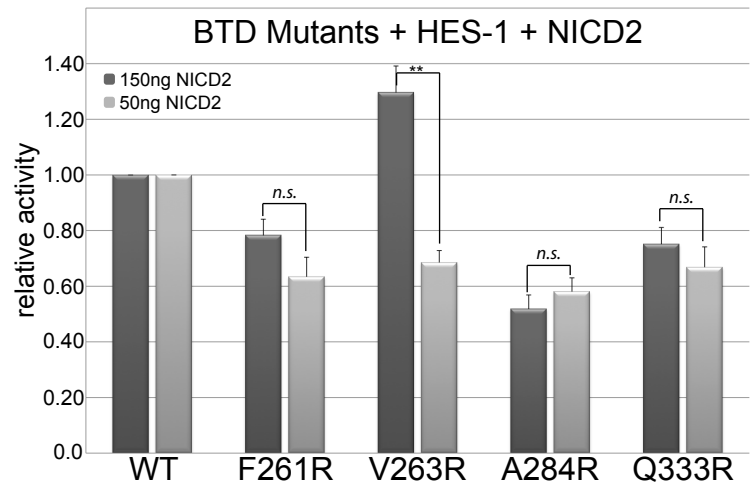**B**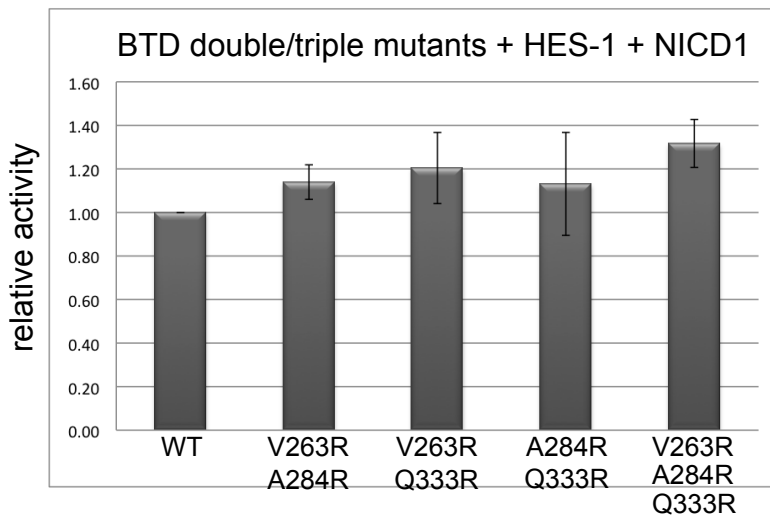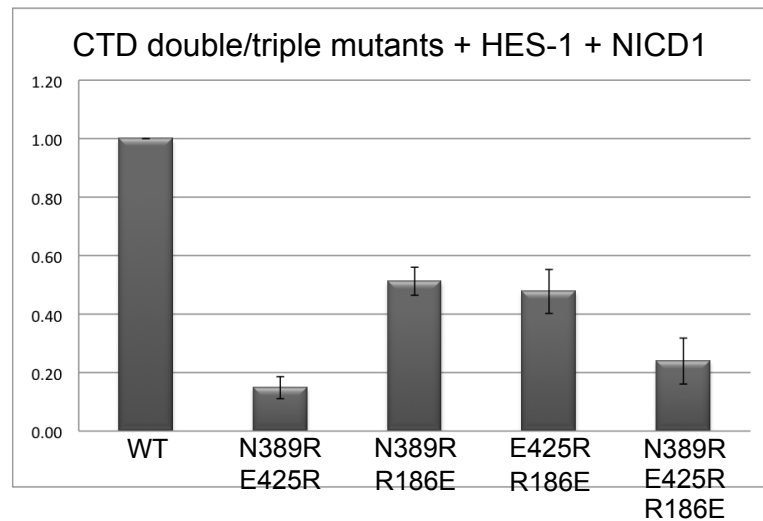**C**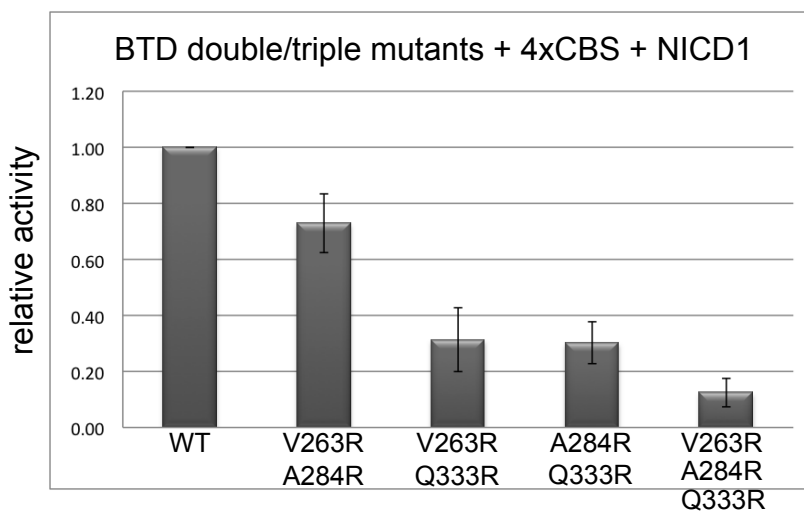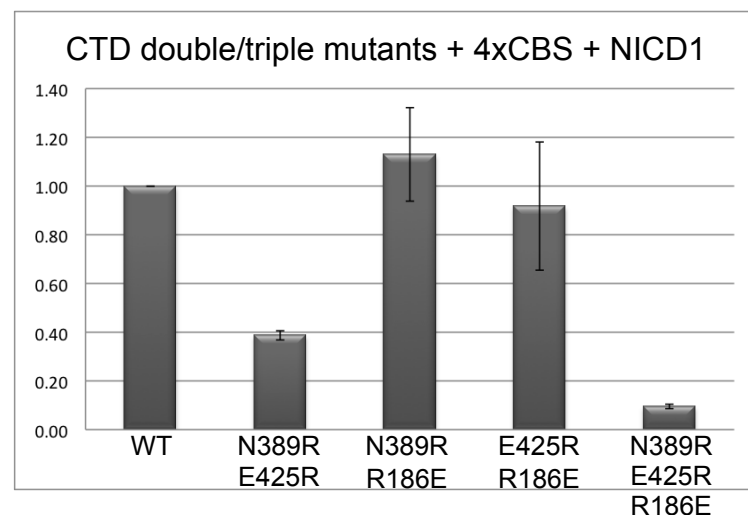

**Figure S2. The effect of NICD expression levels and CSL double/triple mutants on reporter activity.** (A) Figure shows the differences in HES-1 reporter activity for the BTD mutants when either 50ng or 150ng of NICD1/2 are used for transfection. (B,C) Figure shows the cumulative effects of double- and triple-mutations in the BTD and CTD of CSL using the HES-1 (panel B) and 4xCBS (panel C) reporters with NICD1. The data shown are derived from at least three independent experiments performed in duplicate and represent the means  $\pm$  SEM (standard error of the mean). Statistical significance was assessed using paired student t-tests with \*,  $P \leq 0.05$ ; \*\*,  $P \leq 0.01$ ; \*\*\*,  $P \leq 0.001$ ; and ns, not significant.
